# Supplementary material
Source: publisher figshare collection journal article supplement (https://acs.figshare.com/ndownloader/files/12910436)
Supplement: Supplementary file 1 [file 12910436]

## **Supporting Information**

# **Efficiently Improving the Stability of Inverted Perovskite Solar Cells by Employing Polyethylenimine-Modified Carbon Nanotubes as Electrodes**

Yu Zhou<sup>a</sup>, Xuewen Yin<sup>a</sup>, Qiang Luo<sup>b</sup>, Xingyue Zhao<sup>a</sup>, Duanliang Zhou<sup>c</sup>, Jianhua Han<sup>a</sup>,  
Feng Hao<sup>b</sup>, Meiqian Tai<sup>a</sup>, Jianbao Li<sup>a,d</sup>, Peng Liu<sup>c\*</sup>, Kaili Jiang<sup>c\*</sup>, Hong Lin<sup>a\*</sup>

*<sup>a</sup>State Key Laboratory of New Ceramics & Fine Processing, School of Materials  
Science and Engineering, Tsinghua University, Beijing 100084, P. R. China.*

*<sup>b</sup>State Key Laboratory of Electronic Thin Film and Integrated Devices, University of  
Electronic Science and Technology of China, Chengdu 610054, P. R. China.*

*<sup>c</sup>State Key Laboratory of Low-Dimensional Quantum Physics, Tsinghua-Foxconn  
Nanotechnology Research Center, Department of Physics, Tsinghua University,  
Beijing 100084, P. R. China.*

*<sup>d</sup>Key Laboratory of Ministry of Education for Advanced Materials in Tropical Island  
Resources, Materials and Chemical Engineering Institute, Hainan University, Haikou  
570228, China*

*\*Corresponding E-mail: honglin@mail.tsinghua.edu.cn;*

*JiangKL@mail.tsinghua.edu.cn; pengliu@mail.tsinghua.edu.cn*

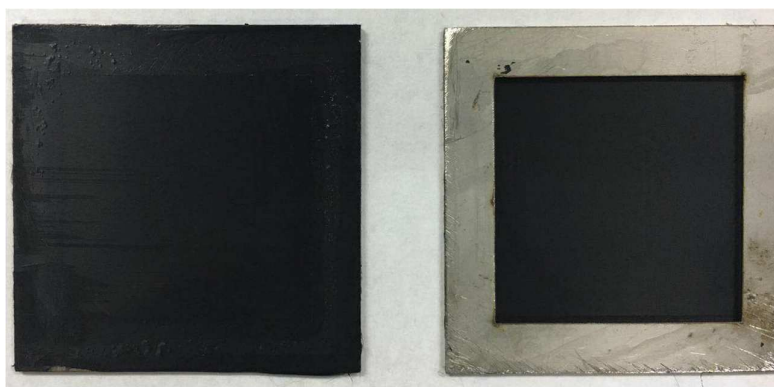

**Figure S1.** The physical photograph of CSCNT films (Left: front side; Right: back side) on the metal frame.

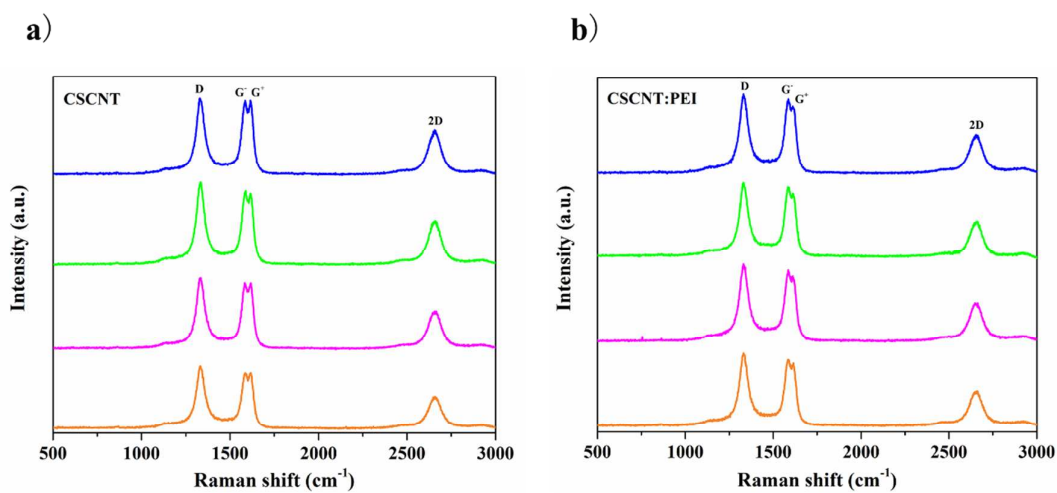

**Figure S2.** Raman spectra of CSCNT a) before and b) after PEI modification.

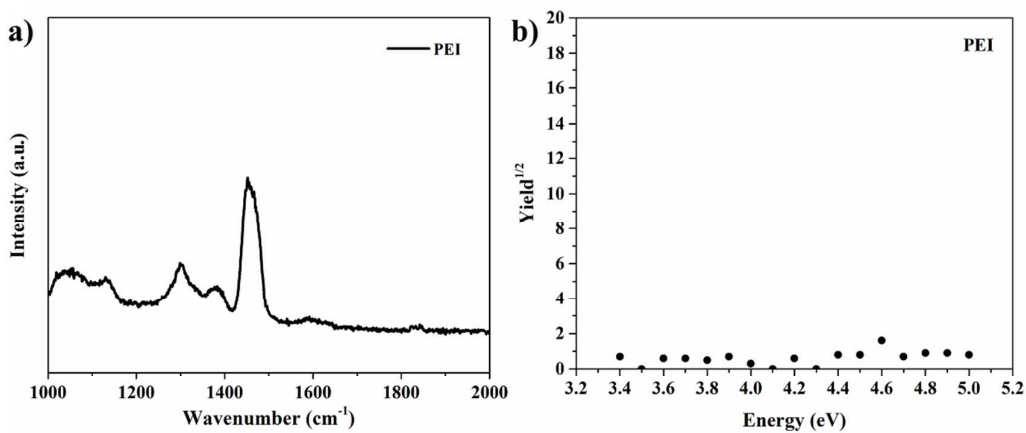

**Figure S3.** a) Raman spectra and b) PESA spectra of PEI.

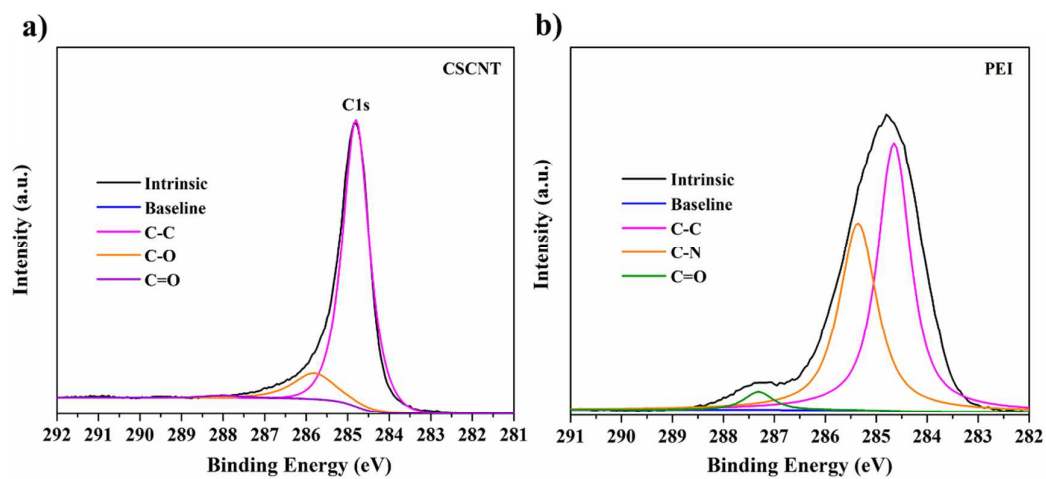

**Figure S4.** Deconvolution of C1s XPS spectra of a) CSCNT and b) PEI.

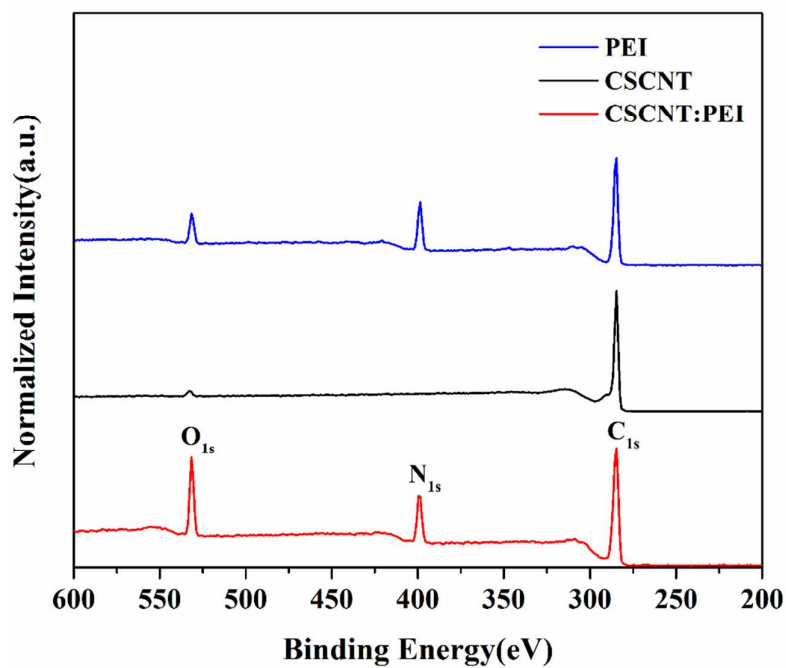

**Figure S5.** XPS wide scan survey spectra of PEI, CSCNT and CSCNT:PEI.

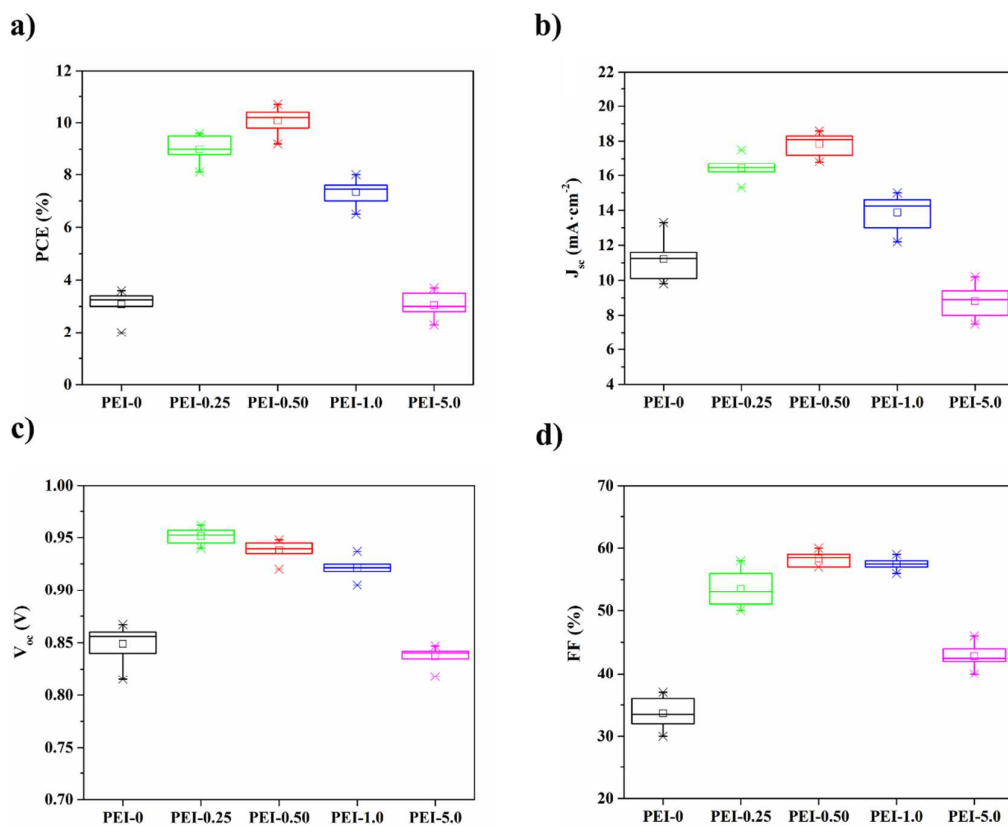

**Figure S6.** Photovoltaic parameters of PSCs based on CSCNT electrodes with different PEI modification concentration: a) PCE b)  $J_{sc}$  c)  $V_{oc}$  d) FF. The device parameters were selected randomly from 10 devices fabricated on 10 different FTO substrates.

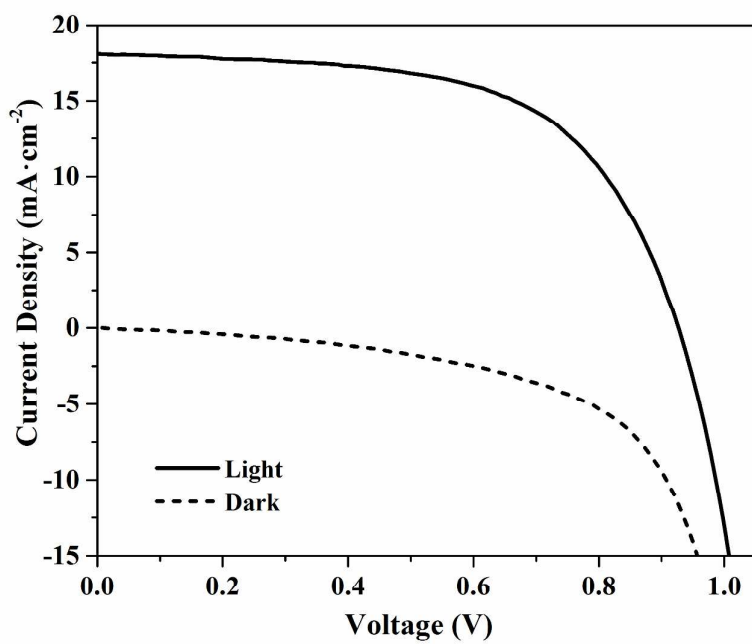

**Figure S7.** *J-V* curves of CSCNT:PEI based solar cells under light (solid line) and dark (dashed line).

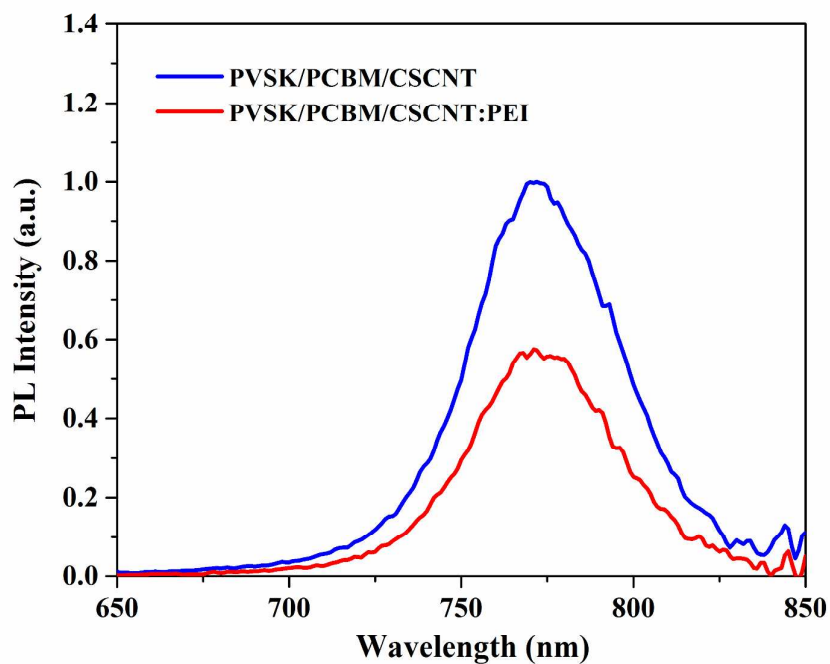

**Figure S8.** Steady-state PL spectra of the perovskite/PCBM/CSCNT (blue line) and perovskite/PCBM/CSCNT:PEI (red line).

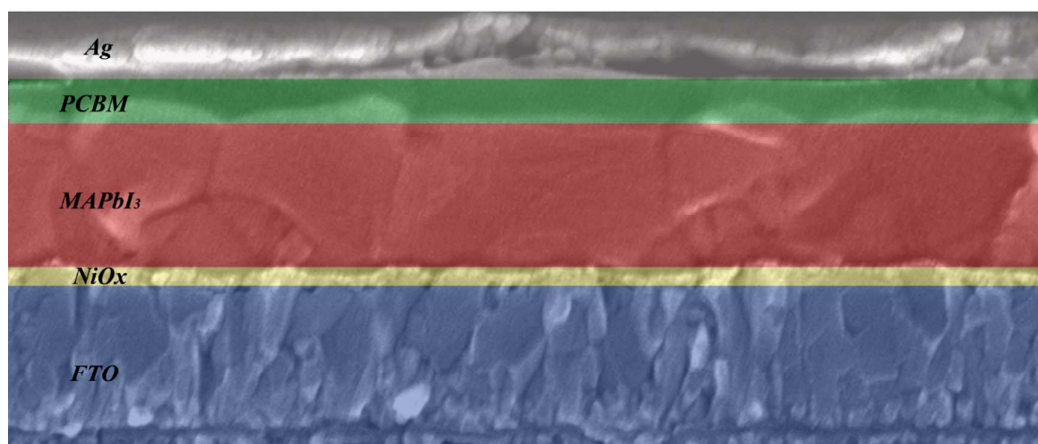

**Figure S9.** Typical cross-sectional SEM image of the PSC based on Ag electrode.

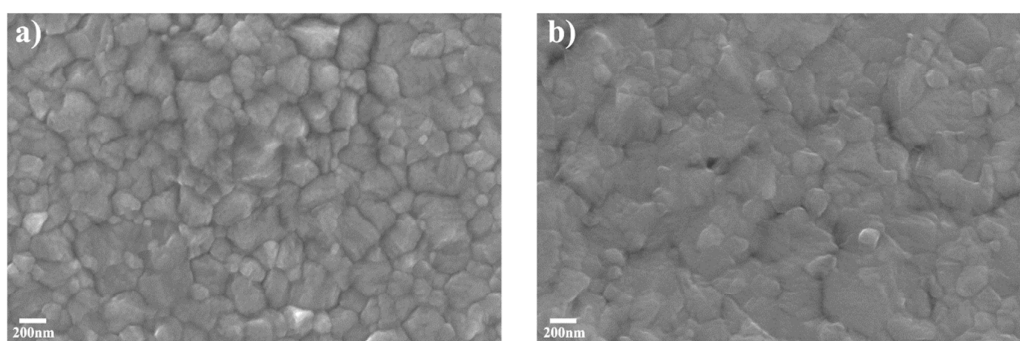

**Figure S10.** SEM images of the MAPbI<sub>3</sub> films in FTO/NiO<sub>x</sub>/MAPbI<sub>3</sub>/PCBM/Ag a) before and b) after thermal treatment at 60 °C for 96 h.

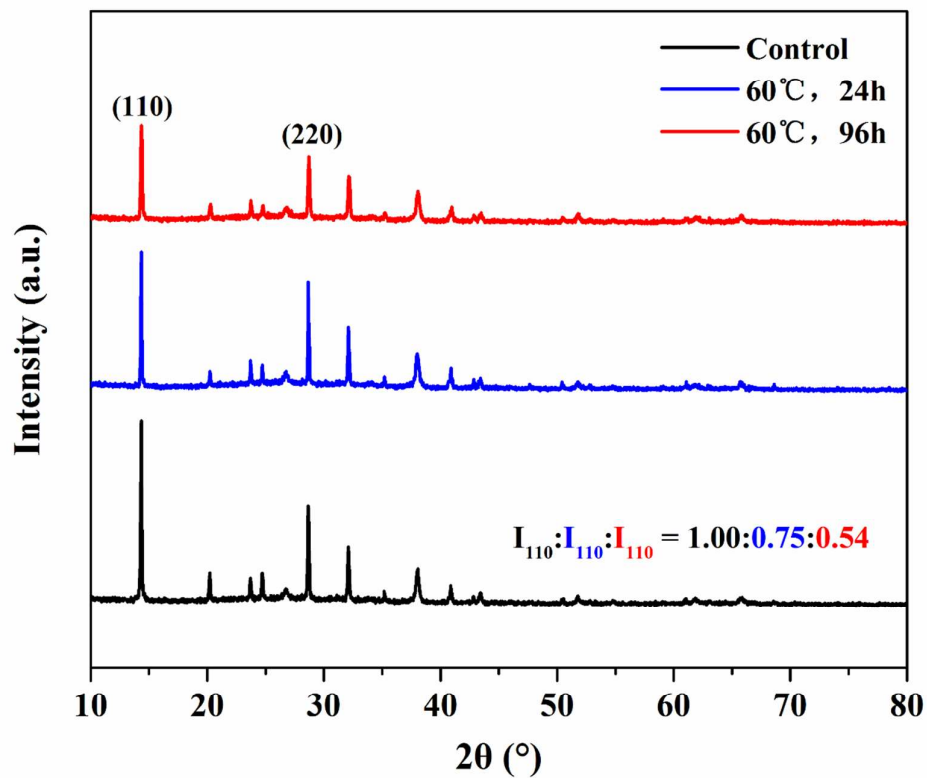

**Figure S11.** XRD spectra of MAPbI<sub>3</sub> films in FTO/NiO<sub>x</sub>/MAPbI<sub>3</sub>/PCBM/Ag with different ageing condition.

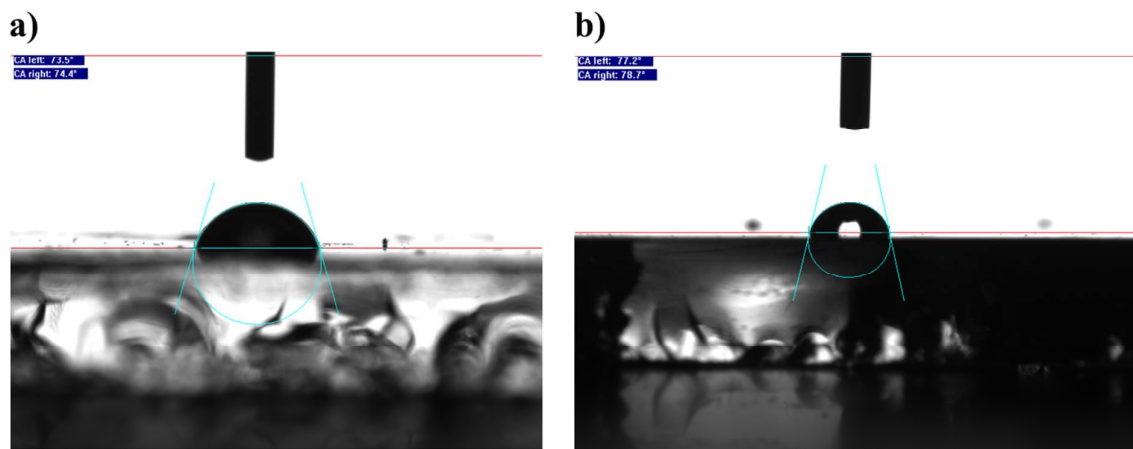

**Figure S12.** Contact angle image of water droplet on the surface of a) CSCNT:PEI and b) Ag.

**Table S1.**  $R_s$  and  $R_{sh}$  from the slop of  $J$ - $V$  curves of the cells at  $V_{oc}$  and  $J_{sc}$  point

| PEI concentration (wt %) | $R_s$ ( $\Omega \cdot \text{cm}^2$ ) | $R_{sh}$ ( $\Omega \cdot \text{cm}^2$ ) |
|--------------------------|--------------------------------------|-----------------------------------------|
| 0                        | 25.7                                 | 173.1                                   |
| 0.25                     | 12.2                                 | 861.3                                   |
| 0.5                      | 6.1                                  | 655.4                                   |
| 1.0                      | 15.64                                | 242.1                                   |
| 5.0                      | 24.6                                 | 241.5                                   |

$R_s$ : series resistance;  $R_{sh}$ : shunt resistance.
